1 **Abstract**

2 During threat assessment, the early detection of danger is highly adaptive, yet the fast  
3 orientation towards safety is also key to survival. The present study aimed to explore how  
4 the human brain searches for safety by manipulating subjects' attentional set to cues  
5 associated with shock probability. Subjects were asked to judge random dots motion  
6 (RDM) direction and could be shocked for incorrect responses (RDM task) while keeping  
7 alert in detecting the shock probability cues (cue detection task). In contrast to the safe  
8 condition, where subjects searched for cues associated with no shock probability, incorrect  
9 responses to 'dangerous+' (D+) cues would increase the shock probability and correct  
10 responses to 'dangerous-' (D-) cues would decrease shock probability. In the RDM task,  
11 results showed that relative to the D+, the safe attentional set resulted in stronger  
12 activation in the ventral medial prefrontal cortex (vmPFC), a core region involved in flexible  
13 threat assessment and safety signalling. The vmPFC was also recruited by the D-  
14 compared to the D + attentional set. In the cue detection task, shorter response times and  
15 greater accuracy were observed for D+ compared to D- and safe cues. Correspondingly,  
16 at the neural level D+ cues induced increased activity in the frontoparietal attention  
17 network including the inferior parietal lobule and intraparietal sulcus. Overall, our findings  
18 demonstrate that attentional set for searching safety recruits the vmPFC, while detection  
19 of threat elicits activity in the frontoparietal attention network, suggesting a new role for  
20 these regions in human defensive survival circuitry.

1 **Significance Statement**

2 While early detection of threat is highly adaptive, the fast orientation towards safety is also  
3 key to survival. However, little is known about neural mechanisms underlying attentional  
4 set to safety. Using a novel dots motion paradigm combined with fMRI, we explored how  
5 human brain prepares for safety searching by manipulating subjects' attentional set to  
6 cues associated with shock probability. Relative to the dangerous attentional set  
7 associated with increasing shock probability, the safe attentional set resulted in stronger  
8 activity in the ventral medial prefrontal cortex, a core region involved in flexible threat  
9 assessment and safety signalling, suggesting a new role for this region in human  
10 defensive survival system in encoding stimuli with survival significance.

## 1 **Introduction**

2 Our attention systems have evolved to detect stimuli that are of survival value, with early  
3 detection of potential ecological dangers being of crucial importance. During threat  
4 assessment, the detection of threat per se is only one among several other parallel  
5 strategies including threat monitoring, prediction and safety seeking (Mobbs et al., 2015).  
6 In the case of searching for safety, the organism will search the environment for a safe  
7 refuge and in turn, this will influence its decision to either freeze or flee. For example, it  
8 has been theorized that when escape is viable, flight will occur but when it is not then  
9 freezing will be the choice of defense (Blanchard and Blanchard, 1990). Consequently,  
10 decreased fear induced by the knowledge of being safe facilitates exploitation of the  
11 environment by organisms and thus increases their foraging and copulation opportunities  
12 (Cooper and Blumstein, 2015; Rogan et al., 2005). How the human brain implements this  
13 safety search strategy is unknown.

14 Safety searching is not only critical for increasing the probability of escape from  
15 predators but also affects fear perception. Animal studies have shown that in the presence  
16 of danger, safety cues can abolish innate defensive analgesia (Wiertelak et al., 1992).  
17 Fear conditioning studies have also provided evidence that learned safety (in the context  
18 of the unpaired neutral vs. the aversive conditioned stimulus) is associated mainly with the  
19 medial prefrontal cortex (mPFC) and basolateral amygdala (Likhtik, et al., 2014; Stujenske  
20 et al., 2014). Access to safety can decrease fear responses either in healthy populations  
21 (Grillon et al., 1994; Hood et al., 2010) or in patients with affective disorders such as panic

1 disorder and claustrophobia (Carter et al., 1995; Telch et al., 1994). Human fMRI studies  
2 have further highlighted the role of the ventral mPFC (vmPFC) in both the learned safety  
3 and safety signaling (Eisenberger et al., 2011; Mobbs et al., 2010, Schiller et al., 2008;  
4 Suarez-Jimenez et al., 2018).

5 The present study aimed to investigate the neural mechanisms underlying safety  
6 search by manipulating attentional set to safe or dangerous cues using a novel dot-motion  
7 paradigm combined with electric shocks. In this paradigm, subjects were asked to judge  
8 dot-motion direction while keeping alert to the emergence of safety or danger cues that  
9 were associated with either a neutral or aversive outcome (electric shocks). Subjects could  
10 be shocked for incorrect responses in the dangerous condition and the shock probability  
11 depended on subjects' performance. Based on the specific role of the vmPFC in safety  
12 encoding (Eisenberger et al., 2011; Mobbs et al., 2010; Schiller et al., 2008), we predicted  
13 that attentional set to safety search would be mainly under the control of the vmPFC. We  
14 additionally predicted that the goal directed attentional network could be involved in  
15 searching for dangerous cues (Corbetta and Shulman, 2002; Ptak, 2012; Singh-Curry and  
16 Husain, 2009), driven by the higher motivation level occurring in response to cues  
17 signaling danger relative to safety (Failing and Theeuwes, 2017; Vuilleumier, 2005).

18

## 19 **Methods and Materials**

### 20 **Participants**

21 26 healthy students (13 males, mean age = 22.86 years, SD = 4.03) participated in the

1 present study. All subjects were right-handed and had normal or corrected-to-normal  
2 vision. None of them reported a history of, or current neurological or psychiatric symptoms.  
3 4 subjects were excluded due to excessive head motion (1 subject), extremely low  
4 response accuracy (RA) to shock probability cues (2 subjects) or technical problems  
5 during scanning (1 subject). Thus, 22 subjects were included in the final analysis. Written  
6 informed consent was obtained from all subjects before study inclusion. The study and all  
7 procedures were approved by the local ethical committee and were in accordance with  
8 the latest version of the Declaration of Helsinki.

9

## 10 **Stimuli and Procedure**

11 A novel foveal dot-motion paradigm was used in the present study (Figure 1-1), which  
12 consisted of 3 threat conditions. The threat condition was indicated by a red ('dangerous+':  
13 D+), yellow ('dangerous-': D-), or green square (safe) for 2 s before each block. Subjects  
14 were then asked to complete 2 rating tasks on their confidence and anxiety levels in  
15 performing the upcoming blocks using a 1-9 Likert scale within 4 s, followed by a jittered  
16 interval of 1-5 s. The foveal moving dots stimuli were generated using Psychopy2 software  
17 (v1.83) (Peirce, 2009). Each screen consisted of 100 white random dots (10 × 10 pixels)  
18 displayed on a grey background with a moving speed of 0.005 frame. Each dot had a  
19 lifetime of 25 frames and was randomly assigned a new position after finishing its lifetime.  
20 There were 2 types of tasks in each block and each block comprised 22 trials with a jittered  
21 interval of 1-3 s. In the random dots motion (RDM) discrimination task (Figure 1A), dots

1 were presented with a variety of coherence levels ranging from 9%-11%, 14%-16%, and  
2 34%-36% to the left or right direction corresponding to difficult, moderate and easy levels,  
3 as determined by an independent pilot study. Dots with these three percentages of  
4 coherence moved to left in half of the trials and to the right in the other half. The dots were  
5 displayed on the screen for 2 s and subjects were asked to judge the movement direction  
6 before they disappeared by pressing either the 'left' or 'right' response buttons. For  
7 incorrect responses, subjects could be punished by one electric shock with an initial  
8 probability of 50%, as indicated by a 2-s 'flash' symbol feedback. In the shock probability  
9 cue detection task (Figure 2A), subjects could minimize the shock probability by giving  
10 correct responses to 3 different colored dots corresponding to the 3 threat condition cues.  
11 In the D+ condition (red dot), while correct responses did not change the shock probability  
12 each incorrect response increased it by 10%. In the D- condition (yellow dot), while each  
13 correct response decreased the shock probability by 10%, incorrect responses did not  
14 change it. Shock probability changes were indicated by a 2-s feedback. The feedback was  
15 a 'flash' symbol with specific shock probability changes (e.g., '+10%' or '-10%') appearing  
16 above the symbol and the current shock probability below it. In the safe condition (green  
17 dot), there was no shock and incorrect responses were given a 2-s 'cross' feedback. Only  
18 responses with reaction times (RTs) shorter than 650 ms were categorized as correct. The  
19 colored dot was presented for 0.5 s and subjects were instructed to respond as fast as  
20 possible before it disappeared. These colored dots were carefully counterbalanced in  
21 luminance and size. To further show that there was no perceptual bias for the different

1 colored dots, we also conducted a control experiment with an independent sample (N =  
2 18) using a similar dot-motion paradigm, but without administering shock. This showed  
3 that there was no significant effect across the different colored dots on either response  
4 RTs ( $p_s > 0.196$ ) or RA ( $p_s > 0.210$ ). To maintain maximal continuous attention set for  
5 searching of the shock probability cues, subjects were clearly informed that the colored  
6 dot could appear at any time point during the 2-s display of white dots on the screen and  
7 that only a fast enough correct response would be regarded as a 'real' correct response.  
8 Following the outcome feedback, subjects were asked to rate their anxiety level while  
9 performing the task. In each block, there were 2, 4, or 6 colored dot trials presented in a  
10 pseudorandom order among the 22 trials. There were 9 blocks in total with 3 blocks in  
11 each threat condition.

12

### 13 **Image Acquisition and Data Analysis**

14 Images were collected using a 3 T, GE Discovery MR750 scanner (General Electric  
15 Medical System, Milwaukee, WI, USA). For the fMRI scan, a time series of volumes was  
16 acquired using a T2\*-weighted EPI pulse sequence (repetition time, 2000 ms; echo time,  
17 25 ms; slices, 45; thickness, 3 mm; field of view, 192 × 192 mm; resolution, 64 ×  
18 64; flip angle, 77°). High-resolution whole-brain volume T1\*-weighted images (1 mm  
19 isotropic resolution) were acquired obliquely with a three-dimensional spoiled gradient  
20 echo pulse sequence before the fMRI scan.

21 Brain images were processed using the SPM8 software package (Wellcome



1 Department of Cognitive Neurology, London, UK, <http://www.fil.ion.ucl.ac.uk/spm/spm8>  
2 (Friston *et al*, 1994). The first five images were excluded to achieve magnet-steady images  
3 and the remaining functional images were realigned to correct for head motion based on  
4 a six-parameter rigid body algorithm. After co-registering the mean functional image and  
5 the T1 image, the T1 image was segmented to determine the parameters for normalizing  
6 the functional images to Montreal Neurological Institute (MNI) space. Next normalized  
7 images were spatially smoothed with an 8 mm full-width at half maximum of Gaussian  
8 kernel.

9 The first-level design matrix included 19 regressors (threat condition cue, confidence  
10 rating, pre-anxiety rating, three threat conditions at each difficulty level, three colored  
11 threat dots, outcome feedback of direction discrimination task, outcome feedback of  
12 colored dots task, delivered shocks, post-anxiety rating) and the 6 head-motion  
13 parameters convolved with the canonical hemodynamic response function. On the first  
14 level, contrast images for each condition were created for each subject. On the second  
15 level, a flexible factorial design was used for the dots moving direction discrimination task  
16 to examine the main effect of threat condition and the interaction between threat condition  
17 and difficulty. For the cue detection task, a one-way ANOVA within subject design was  
18 used to test the main effect of threat condition. For the whole brain analysis, a significance  
19 threshold of  $P < 0.05$  false discovery rate (FDR) correction was used with a minimum  
20 cluster size of 10 contiguous voxels.

21 To examine the safety-related effect in a more sensitive way, we further performed a

1 hypothesis-driven region of interest (ROI) analysis in the vmPFC, which has been shown  
2 as a core region of safety signaling (Eisenberger et al., 2011; Mobbs et al., 2010; Schiller  
3 et al., 2008; Suarez-Jimenez et al., 2018). Furthermore, for the cue detection task, we  
4 additionally included ROIs involved in goal-directed attentional processing, namely the  
5 intraparietal sulcus (IPS), the inferior parietal lobule (IPL) and frontal eye field, which are  
6 core hubs of the frontoparietal attention network (Corbetta and Shulman, 2002; Ptak, 2012;  
7 Singh-Curry and Husain, 2009). The vmPFC was derived from the Automated Anatomic  
8 Labeling atlas (Tzourio-Mazoyer et al., 2002). The SPL, IPL and IPS were derived from  
9 probabilistic maps implemented in Anatomy toolbox 2.1 (Eickhoff et al., 2005). Within  
10 these a priori ROIs, a threshold of  $p < 0.05$  family-wise error (FWE) corrected at peak level  
11 was set for multiple comparisons.

12

## 13 **Results**

### 14 **Behavioral results**

#### 15 *Confidence and anxiety ratings*

16 For ratings, one more subject was excluded due to a data acquisition failure. A repeated-  
17 measures ANOVA on the confidence rating scores with threat condition (D+ vs. D- vs. safe)  
18 as a within-subject factor revealed a significant main effect ( $F(2, 40) = 5.91, p = 0.017$ ),  
19 with a trend of decreased confidence in the D+ ( $p = 0.052$ ; mean  $\pm$  SD =  $4.94 \pm 1.72$ ) and  
20 D- ( $p = 0.074$ ;  $5.49 \pm 1.45$ ) conditions relative to the safe condition ( $6.00 \pm 1.48$ ). For the  
21 pre-anxiety ratings, there was a significant main effect of threat condition ( $F(2, 40) = 20.08$ ,

1 p < 0.001). Post-hoc tests showed subjects were most anxious in performing the D+  
2 condition, followed by D- and safe conditions (Figure 1B). A significant main effect was  
3 also found for the post-anxiety ratings ( $F(2, 40) = 15.33, p < 0.001$ ), with a similar pattern  
4 to the pre-anxiety ratings (Figure 1C).

5

#### 6 *RDM task*

7 We performed a repeated-measures ANOVA on RT and RA with threat condition (D+ vs.  
8 D- vs. safe) and difficulty levels (difficult vs. middle vs. easy) as within-subject factors. For  
9 RT, this analysis revealed a significant main effect of difficulty ( $F(2, 42) = 77.40, p < 0.001$ ).  
10 Post-hoc analysis reveal that, as expected, subject responded fastest in the easy and  
11 slowest in the difficult trials ( $ps < 0.009$ ; Figure 1-2A). For RA, there was a significant main  
12 effect of difficulty ( $F(2, 42) = 108.08, p < 0.001$ ), with subjects had a higher accuracy in easy  
13 than in middle and difficult levels ( $ps < 0.001$ ; Figure 1-2B). There were no other significant  
14 effects ( $ps > 0.067$ ).

15

#### 16 *Cue detection task*

17 A repeated-measures ANOVA on RT with threat as within-subject factor revealed a  
18 significant main effect of threat ( $F(2, 42) = 11.93, p < 0.001$ ), with faster responses to the  
19 D+ cue compared to the D- ( $p = 0.001$ ) and safe cues ( $p = 0.003$ ; Figure 2B). For RA, the  
20 main effect of threat was also significant ( $F(2, 42) = 10.78, p < 0.001$ ). Post-hoc test  
21 showed that the RA was higher in the D+ cue relative to the D- ( $p < 0.001$ ) and safe cues

1 (p = 0.007; Figure 2C).

2

### 3 **fMRI results**

#### 4 *RDM task*

5 In the whole brain analysis, we observed increased activity in left rACC, left dmPFC, right  
6 vmPFC, right hippocampus, and bilateral insula in the safe relative to the 'dangerous +' conditions (safe > D+;  $P_{FDR} < 0.05$ ) (Table 1). Comparisons between difficulty levels  
7 showed stronger activation in bilateral inferior frontal gyrus, insula, dmPFC/dACC and  
8 lingual gyrus and other regions for more difficult than easier tasks (see Table 1-1).  
9 However, there were no other significant effects in the whole brain analysis ( $P_{FDR} < 0.05$ ).

11 The hypothesis-driven ROI analysis further revealed stronger activation in the bilateral  
12 vmPFC (left: MNI = -2, 50, -4;  $t = 4.54$ ;  $P_{FWE} = 0.001$ ; voxels = 126; Figure 3A; right: MNI  
13 = 4, 48, -12;  $t = 3.97$ ;  $P_{FWE} = 0.006$ ; voxels = 77) for the safe relative to the D+ conditions  
14 (safe > D+). Increased activity was also observed in the left vmPFC (MNI = -8, 52, -12;  $t$   
15 = 3.46;  $P_{FWE} = 0.024$ ; voxels = 4; Figure 3B) in the D- compared to the D+ conditions (D- >  
16 D+). Given the left vmPFC only has 4 voxels, we further confirmed this effect by extracting  
17 the parameter estimates using an independent coordinate (MNI = -6, 51, -15) associated  
18 with safety processing in a previous study (Eisenberger et al., 2011). A paired t-test  
19 revealed a significantly increased activity of the left vmPFC in the D- (mean = 1.18, SD =  
20 1.79) than the D+ (mean = 0.29, SD = 1.76) conditions ( $t(21) = 2.91$ ,  $P = 0.008$ ).  
21 Importantly, the left vmPFC overlapped between the 'safe > D+' and 'D- > D+' comparisons

1 (Figure 3C). To exclude the possibility that the different number of shocks in D+ and D-  
2 conditions may confound the findings, we examined whether shock number was  
3 associated with the vmPFC activity but found no significant correlations ( $p_s > 0.368$ ).

4 |

#### 5 *Cue detection task*

6 The ROI analysis showed stronger activity in the bilateral IPL (left: MNI = -38, -72,  
7 34;  $t = 4.16$ ;  $P_{FWE} = 0.044$ ; voxels = 36; right: MNI = 50, -56, 36;  $t = 4.66$ ;  $P_{FWE} = 0.013$ ;  
8 voxels = 85) and the right IPS (MNI = 44, -52, 34;  $t = 4.15$ ;  $P_{FWE} = 0.015$ ; voxels = 13) in  
9 response to the D+ compared to the safe cues (D+ > safe cue; Figure 4A). Similar  
10 increased activity was also found for the D- relative to the safe cues (D- > safe cue) in the  
11 right IPL (MNI = 48, -64, 34;  $t = 4.23$ ;  $P_{FWE} = 0.038$ ; voxels = 189) and the right IPS (MNI  
12 = 46, -50, 44;  $t = 4.03$ ;  $P_{FWE} = 0.020$ ; voxels = 33; Figure 4B). For the D- vs. D+ comparison  
13 (D- > D+ cue), we observed a stronger activation in the right IPS (MNI = 44, -38, 48;  $t =$   
14  $3.79$ ;  $P_{FWE} = 0.037$ ; voxels = 10; Figure 4C). To further examine this unpredictable finding,  
15 we performed an exploratory psychophysiological interaction (PPI) analysis using the PPI  
16 toolbox (McLaren *et al*, 2012) with the right IPS as a seed region (6-mm sphere centered  
17 at MNI = 44, -38, 48). Results showed an increased functional connectivity between the  
18 right IPS and the left hippocampus (MNI = -30, -30, -12;  $t = 4.52$ ;  $P_{FWE} = 0.023$ ; voxels =  
19 14). We also found increased rACC activation (MNI = 2, 34, 4;  $t = 4.20$ ;  $P_{FWE} = 0.027$ ;  
20 voxels = 39; Figure 4-2) in response to the safe relative to the D+ cues (safe > D+ cue)  
21 using a mask from the 'safe > D+' contrast ( $P_{FDR} < 0.05$ ) in the RDM task. There were no

1 significant effects in the whole brain analysis ( $P_{FDR} < 0.05$ ).

2

### 3 **Discussion**

4 The present study investigated how the human brain is organized to search for safe vs.

5 dangerous cues using a novel RDM paradigm combined with threat of electric shocks.

6 Results showed that subjects tended to be more confident and less anxious in searching

7 the safe relative to the dangerous cues where they could be shocked for incorrect

8 responses. While we found no evidence for significant effects associated with threat

9 conditions on the RDM task performance at the behavioral level, the left vmPFC was

10 recruited both when attention was set to search the safe and D- cues in comparison to the

11 D+ cues. For the cue detection task, while at behavioral level subjects were faster and

12 more accurate in detecting the D+ than the D- and safe cues, stronger activity was found

13 in the goal directed attentional networks, including IPL and IPS, for detecting the D+ cues.

14 Subjects tended to be less confident and more anxious in performing the more

15 threatening relative to the safe searching tasks, which validated the threat manipulation in

16 the present study and coincided with previous findings that the presence of safe cues

17 decreases anxiety to threat (Grillon et al., 1994; Hood et al., 2010). Since shock probability

18 cues were presented in a spatiotemporally random way in the current paradigm, it was

19 beneficial for subjects to respond conservatively to increase accuracy, and thus decrease

20 shocks, and this may have contributed to the absence of behavioral differences across

21 conditions. For the detection of shock probability cues *per se* in the cue detection task, we

1 found similar patterns for RT and RA with subjects responding faster and more accurately  
2 to D+ than to D- and safe cues. These enhanced behavioral responses could be driven  
3 by a higher motivational value of D+ cues, as demonstrated by similar preferential  
4 processing of threatening stimuli or more valuable stimuli (such as stimuli associated with  
5 higher reward) (Hansen and Hansen, 1988; Hickey et al., 2010).

6 At the neural level, increased activity was found in the rACC, dmPFC, vmPFC, and  
7 hippocampus for the safe relative to the D+ threat conditions in the RDM task. These  
8 regions constitute the ‘cognitive fear’ circuitry implicated in elaborate assessment of distal  
9 threats and consequently can promote behavioral flexibility and optimize survival  
10 decisions (LeDoux and Pine, 2016; McNaughton and Corr, 2004; Price, 2005). Similar  
11 neural response patterns have also been evoked by distal threat in previous human fMRI  
12 studies (Mobbs et al., 2007, 2009; Qi et al., 2017). Furthermore, the vmPFC was also  
13 recruited in the D- compared to the D+ threat conditions and overlapped with the vmPFC  
14 identified when attention was set to safe cues. Given the specific role of the vmPFC in  
15 learned safety and safety signaling (Eisenberger et al., 2011; Mobbs et al., 2010, Schiller  
16 et al., 2008; Suarez-Jimenez et al., 2018), it could be a core region in maintaining attention  
17 set not only to safety but also to less imminent threat. The medial prefrontal areas,  
18 especially the vmPFC, receive and integrate inputs from multiple sensory modalities and  
19 make them available for higher-level cognitive processes such as emotion regulation,  
20 action planning or decision-making (Miller and Cohen, 2001; Öngür and Price, 2000; Price,  
21 2005). These regions also connect to the midbrain periaqueductal gray and limbic regions,

1 including the hippocampus, with the former instigating reflexive defensive reactions to  
2 imminent threat and the latter involving planning derived from its role in prospective  
3 memory (Cohen and O'Reilly, 1996; Miller and Cohen, 2001; Mobbs et al., 2015; Shipley  
4 et al., 1991). The vmPFC also coordinates with the hippocampus in mediating fear  
5 extinction (Kalisch et al., 2006; Milad et al., 2007). High-level information integration in the  
6 medial prefrontal areas would allow more elaborate appraisal of potential threat in the  
7 environment and thus generate appropriate levels of anxiety and fear, thereby enabling  
8 initiation of optimal actions to threat depending on their perceived imminence. These  
9 findings suggest that the neural mechanisms underlying safety search may work in a  
10 similar way to how distal threat is encoded and provide the first evidence that the 'cognitive  
11 fear' circuitry, particularly the medial prefrontal areas, may be specific substrates  
12 underpinning attentional set of searching stimuli that are of survival value in the  
13 environment, including stimuli signaling safety.

14 Note that dysfunction of safety processing is also associated with psychiatric  
15 disorders (Kong et al., 2014), with panic disorder patients showing impaired learning ability  
16 in discriminating between safe and dangerous cues and a less effective fear-reduction by  
17 safety cues (Lissek et al., 2009). High trait anxiety individuals also exhibit exaggerated  
18 fear generation by safety cues (Haddad et al., 2012) and posttraumatic stress disorder  
19 patients fail to inhibit fear response to safety cues (Jovanovic et al., 2010). Thus the medial  
20 prefrontal areas could be a target region for potential noninvasive therapeutic interventions,  
21 such as real-time fMRI neurofeedback training which has been found to be effective at a



1 clinical level (Watanabe et al., 2017).

2 Consistent with faster and more accurate behavioral responses, stronger activity in  
3 the dorsal frontoparietal attention network, including IPL and IPS, was found for the D+  
4 and D- in comparison to the safe cues in the cue detection task. This suggests an  
5 enhanced goal-directed attentional processing for more threatening tasks requiring more  
6 cognitive resources. These findings coincide with previous studies showing facilitated  
7 processing in the attentional network for higher motivational stimuli such as more  
8 threatening or rewarding values (Anderson, 2017; Armony and Dolan, 2002; Failing and  
9 Theeuwes, 2017; Vuilleumier, 2005), which has clear adaptive benefits for survival. Note  
10 that the D- cues also induced stronger activity in the right IPS than the D+ cues, which  
11 could be driven by an increased functional connectivity of the right IPS with the left  
12 hippocampus. This is line with the role of hippocampus either in modulating responses to  
13 less imminent threat (McNaughton and Corr, 2004; Mobbs et al., 2009; 2015) or in  
14 orienting visual attention (Goldfarb et al., 2016; Summerfield et al., 2016). Future studies  
15 are necessary to further investigate this question. Furthermore, the rACC was also  
16 recruited during processing of the safe compared to the D+ cues. Consistent with its role  
17 in attentional set of safety in the RDM task, the enhanced rACC activity may reflect an  
18 elaborate evaluation of the utilization of safety, such as a refuge, which is normally  
19 associated with protection and opportunity to escape.

20 Overall, the present study investigated how the human brain encodes safety  
21 information by modulating subjects' attentional set using a novel dot-motion paradigm.

1 Similar to neural mechanisms involved in processing distal threat, the present study  
2 demonstrated that attention set of safety mainly recruited medial prefrontal regions of the  
3 'cognitive fear' circuitry. Thus, encoding of safety signals may share similar neural  
4 substrates with processing of distal threat that allows for flexible threat assessment and  
5 consequently increases chances of survival for organisms through exploiting their  
6 environment. These findings provide new insights into the role of the medial prefrontal  
7 regions in the defensive survival system in encoding stimuli with survival significance.

1 **References**

- 2 Anderson BA (2017) Reward processing in the value-driven attention network: reward  
3 signals tracking cue identity and location. *Soc Cogn Affect Neurosci* 12:461-467.
- 4 Armony JL, Dolan RJ (2002) Modulation of spatial attention by fear-conditioned stimuli: an  
5 event-related fMRI study. *Neuropsychologia* 40:817-826.
- 6 Blanchard RJ, Blanchard DC (1990) An ethoexperimental analysis of defense, fear, and  
7 anxiety. In: *Otago conference series, No. 1. Anxiety* (McNaughton N, Andrews G, eds),  
8 pp124-133. Dunedin: University of Otago Press.
- 9 Carter MM, Hollon SD, Carson R, Shelton RC (1995) Effects of a safe person on induced  
10 distress following a biological challenge in panic disorder with agoraphobia. *J Abnorm*  
11 *Psychol* 104:156-163.
- 12 Cohen JD, O'Reilly RC (1996) A preliminary theory of the interactions between prefrontal  
13 cortex and hippocampus that contribute to planning and prospective memory. In:  
14 *Prospective memory: Theory and applications* (Brandimonte MA, Einstein GO,  
15 McDaniel MA, eds), pp267-295. New York: Psychology Press.
- 16 Cooper Jr WE, Blumstein DT (2015) *Escaping from predators: an integrative view of*  
17 *escape decisions*. Cambridge: Cambridge University Press.
- 18 Corbetta M, Shulman GL (2002) Control of goal-directed and stimulus-driven attention in  
19 the brain. *Nat Rev Neurosci* 3:201-215.
- 20 Critchley HD (2004) The human cortex responds to an interoceptive challenge. *Proc Natl*  
21 *Acad Sci USA* 101:6333-6334.

- 1 Eisenberger NI, Master SL, Inagaki TK, Taylor SE, Shirinyan D, Lieberman MD, Naliboff  
2 BD (2011) Attachment figures activate a safety signal-related neural region and  
3 reduce pain experience. *Proc Natl Acad Sci USA* 108:11721-11726.
- 4 Fanselow MS, Lester LS (1988) A functional behavioristic approach to aversively  
5 motivated behavior: Predatory imminence as a determinant of the topography of  
6 defensive behavior. In: *Evolution and learning* (Bolles RC, Beecher MD, eds), pp185-  
7 211. Hillsdale: Erlbaum.
- 8 Failing M, Theeuwes J (2017) Selection history: How reward modulates selectivity of  
9 visual attention. *Psychon Bull Rev*, <https://doi.org/10.3758/s13423-017-1380-y>
- 10 Goldfarb EV, Chun MM, Phelps EA (2016) Memory-guided attention: independent  
11 contributions of the hippocampus and striatum. *Neuron* 89:317-324.
- 12 Grillon C, Falls WA, Ameli R, Davis M (1994) Safety signals and human anxiety: A fear-  
13 potentiated startle study. *Anxiety* 1:13-21.
- 14 Haddad AD, Pritchett D, Lissek S, Lau JY (2012) Trait anxiety and fear responses to safety  
15 cues: Stimulus generalization or sensitization? *J Psychopathol Behav Assess* 34:323-  
16 331.
- 17 Hansen CH, Hansen RD (1988) Finding the face in the crowd: An anger superiority effect.  
18 *J Pers Soc Psychol* 54:917-924.
- 19 Hickey C, Chelazzi L, Theeuwes J (2010) Reward changes salience in human vision via  
20 the anterior cingulate. *J Neurosci* 30:11096-11103.
- 21 Hood HK, Antony MM, Koerner N, Monson CM (2010) Effects of safety behaviors on fear

- 1 reduction during exposure. *Behav Res Ther* 48:1161-1169.
- 2 Jovanovic T, Norrholm SD, Blanding NQ, Davis M, Duncan E, Bradley B, Ressler KJ (2010)
- 3 Impaired fear inhibition is a biomarker of PTSD but not depression. *Depress Anxiety*
- 4 27:244-251.
- 5 Kalisch R, Korenfeld E, Stephan KE, Weiskopf N, Seymour B, Dolan RJ (2006) Context-
- 6 dependent human extinction memory is mediated by a ventromedial prefrontal and
- 7 hippocampal network. *J Neurosci* 26:9503-9511.
- 8 Kong E, Monje FJ, Hirsch J, Pollak DD (2014) Learning not to fear: neural correlates of
- 9 learned safety. *Neuropsychopharmacol* 39:515-527.
- 10 LeDoux JE, Pine DS (2016) Using neuroscience to help understand fear and anxiety: a
- 11 two-system framework. *Am J Psychiatry* 173:1083-1093.
- 12 Likhtik E, Stujenske JM, Topiwala MA, Harris AZ, Gordon JA (2014) Prefrontal entrainment
- 13 of amygdala activity signals safety in learned fear and innate anxiety. *Nat Neurosci*
- 14 17:106-113.
- 15 Lissek S, Rabin SJ, McDowell DJ, Dvir S, Bradford DE, Geraci M, Pine DS, Grillon C (2009)
- 16 Impaired discriminative fear-conditioning resulting from elevated fear responding to
- 17 learned safety cues among individuals with panic disorder. *Behav Res Ther* 47:111-
- 18 118.
- 19 McLaren DG, Ries ML, Xu G, Johnson SC (2012) A generalized form of context-dependent
- 20 psychophysiological interactions (gPPI): a comparison to standard approaches.
- 21 *NeuroImage* 61:1277-1286.

- 1 McNaughton N, Corr PJ (2004) A two-dimensional neuropsychology of defense:  
2 fear/anxiety and defensive distance. *Neurosci Biobehav Rev* 28:285-305.
- 3 Milad MR, Wright CI, Orr SP, Pitman RK, Quirk GJ, Rauch SL (2007) Recall of fear  
4 extinction in humans activates the ventromedial prefrontal cortex and hippocampus  
5 in concert. *Biol Psychiatry* 62:446-454.
- 6 Miller EK, Cohen JD (2001) An integrative theory of prefrontal cortex function. *Annu Rev*  
7 *Neurosci* 24:167-202.
- 8 Mobbs D, Hagan CC, Dalgleish T, Silston B, Prévost C (2015) The ecology of human fear:  
9 survival optimization and the nervous system. *Front Neurosci* 9:55.
- 10 Mobbs D, Marchant JL, Hassabis D, Seymour B, Tan G, Gray M, Petrovic P, Dolan RJ,  
11 Frith CD (2009) From threat to fear: the neural organization of defensive fear systems  
12 in humans. *J Neurosci* 29:12236-12243.
- 13 Mobbs D, Petrovic P, Marchant JL, Hassabis D, Weiskopf N, Seymour B, Dolan RJ, Frith  
14 CD (2007) When fear is near: threat imminence elicits prefrontal-periaqueductal gray  
15 shifts in humans. *Science* 317:1079-1083.
- 16 Mobbs D, Yu R, Rowe JB, Eich H, FeldmanHall O, Dalgleish T (2010). Neural activity  
17 associated with monitoring the oscillating threat value of a tarantula. *Proc Natl Acad*  
18 *Sci USA* 107:20582-20586.
- 19 Öngür D, Price JL (2000) The organization of networks within the orbital and medial  
20 prefrontal cortex of rats, monkeys and humans. *Cereb Cortex* 10:206-219.
- 21 Ptak R (2012) The frontoparietal attention network of the human brain: action, saliency,

- 1 and a priority map of the environment. *Neuroscientist* 18:502-515.
- 2 Panksepp J (2011) The basic emotional circuits of mammalian brains: do animals have  
3 affective lives? *Neurosci Biobehav Rev* 35:1791-1804.
- 4 Peirce JW (2009) Generating stimuli for neuroscience using PsychoPy. *Front Neuroinform*  
5 2:10.
- 6 Price JL (2005) Free will versus survival: brain systems that underlie intrinsic constraints  
7 on behavior. *J Comp Neurol* 493:132-139.
- 8 Qi S, Sun J, Guo F, Daw N, Hassabis D, Mobbs D (2017) How Cognitive and Reactive  
9 Fear Circuits Optimize Escape Decisions in Humans. *bioRxiv* doi:  
10 <https://doi.org/10.1101/207936>
- 11 Rogan MT, Leon KS, Perez DL, Kandel ER (2005) Distinct neural signatures for safety  
12 and danger in the amygdala and striatum of the mouse. *Neuron* 46:309-320.
- 13 Schiller D, Levy I, Niv Y, LeDoux JE, Phelps EA (2008) From fear to safety and back:  
14 reversal of fear in the human brain. *J Neurosci* 28:11517-11525.
- 15 Shackman AJ, Salomons TV, Slagter HA, Fox AS, Winter JJ, Davidson RJ (2011) The  
16 integration of negative affect, pain, and cognitive control in the cingulate cortex. *Nat*  
17 *Rev Neurosci* 12:154-167.
- 18 Shipley MT, Ennis M, Rizvi TA, Behbehani MM (1991) Topographical specificity of  
19 forebrain inputs to the midbrain periaqueductal gray: evidence for discrete  
20 longitudinally organized input columns. In: *The midbrain periaqueductal gray matter*  
21 (Depaulis A, Bandler R, eds), pp417-448. Boston: Springer.

- 1 Singh-Curry V, Husain M (2009) The functional role of the inferior parietal lobe in the dorsal  
2 and ventral stream dichotomy. *Neuropsychologia* 47:1434-1448.
- 3 Stujenske JM, Likhtik E, Topiwala MA, Gordon JA (2014) Fear and safety engage  
4 competing patterns of theta-gamma coupling in the basolateral amygdala. *Neuron*  
5 83:919-933.
- 6 Suarez-Jimenez B, Bisby JA, Horner AJ, King JA, Pine DS, Burgess N (2018) Linked  
7 networks for learning and expressing location-specific threat. *Proc Natl Acad Sci USA*  
8 doi:10.1073/pnas.1714691115
- 9 Summerfield JJ, Lepsien J, Gitelman DR, Mesulam MM, Nobre AC (2006) Orienting  
10 attention based on long-term memory experience. *Neuron* 49:905-916.
- 11 Telch MJ, Valentiner D, Bolte M (1994) Proximity to safety and its effects on fear prediction  
12 bias. *Behav Res Ther* 32:747-751.
- 13 Tovote P, Esposito MS, Botta P, Chaudun F, Fadok JP, Markovic M, Wolff SB,  
14 Ramakrishnan C, Fenno L, Deisseroth K, Herry C, Arber S, Lüthi A (2016) Midbrain  
15 circuits for defensive behaviour. *Nature* 534:206-223.
- 16 Tzourio-Mazoyer N, Landeau B, Papathanassiou D, Crivello F, Etard O, Delcroix N,  
17 Mazoyer B, Joliot M. (2002) Automated anatomical labeling of activations in SPM  
18 using a macroscopic anatomical parcellation of the MNI MRI single-subject brain.  
19 *NeuroImage* 15:273-289.
- 20 Vuilleumier P (2005) How brains beware: neural mechanisms of emotional attention.  
21 *Trends Cogn Sci* 9:585-594.



- 1 Watanabe T, Sasaki Y, Shibata K, Kawato M (2017) Advances in fMRI real-time  
2 neurofeedback. Trends Cogn Sci 21:997-1010.
- 3 Wiertelak EP, Maier SF, Watkins LR (1992) Cholecystokinin antianalgesia: safety cues  
4 abolish morphine analgesia. Science 256:830-833.

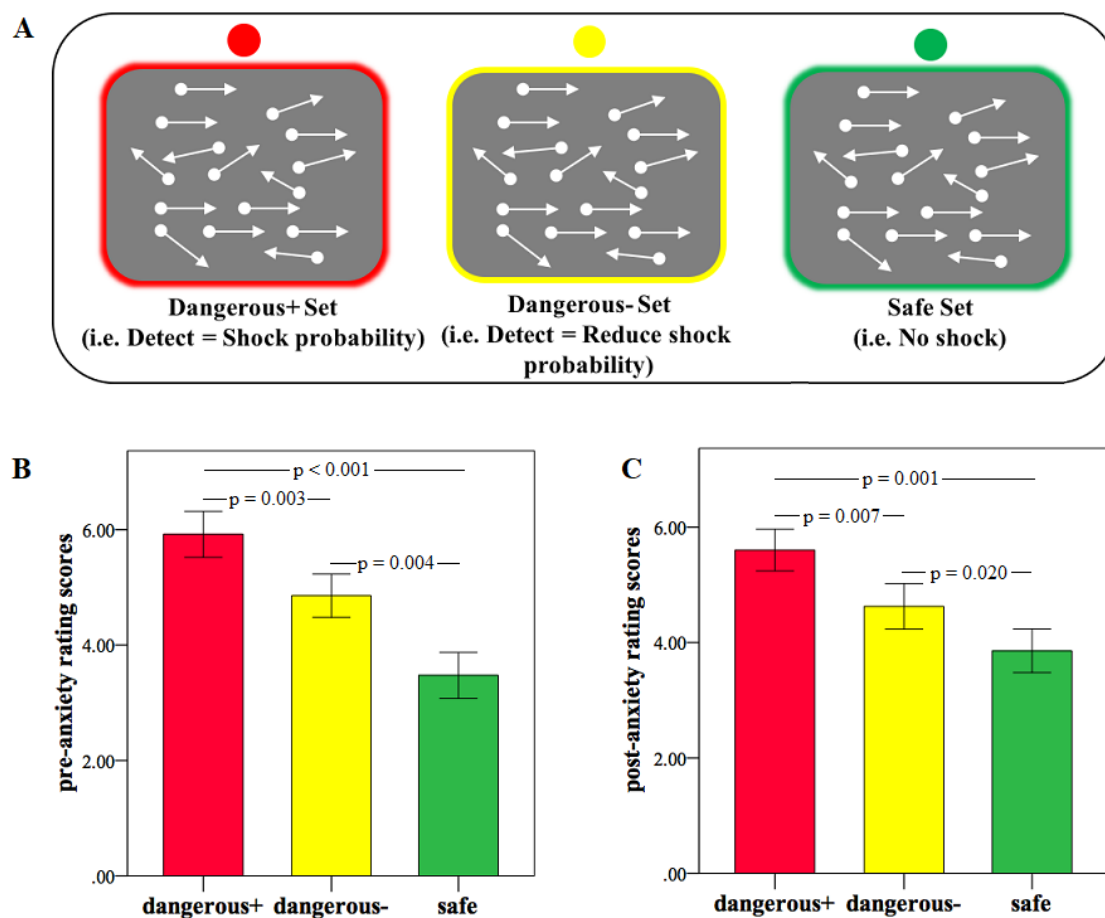

1  
2 **Figure 1.** (A) Schematic examples of the random dots motion discrimination task. In this task, subjects were asked to judge  
3 the moving direction by pressing the 'left' or 'right' buttons. (B) Mean pre-anxiety rating scores before each block in each  
4 threat condition. (C) Mean post-anxiety rating scores after each block in each threat condition.

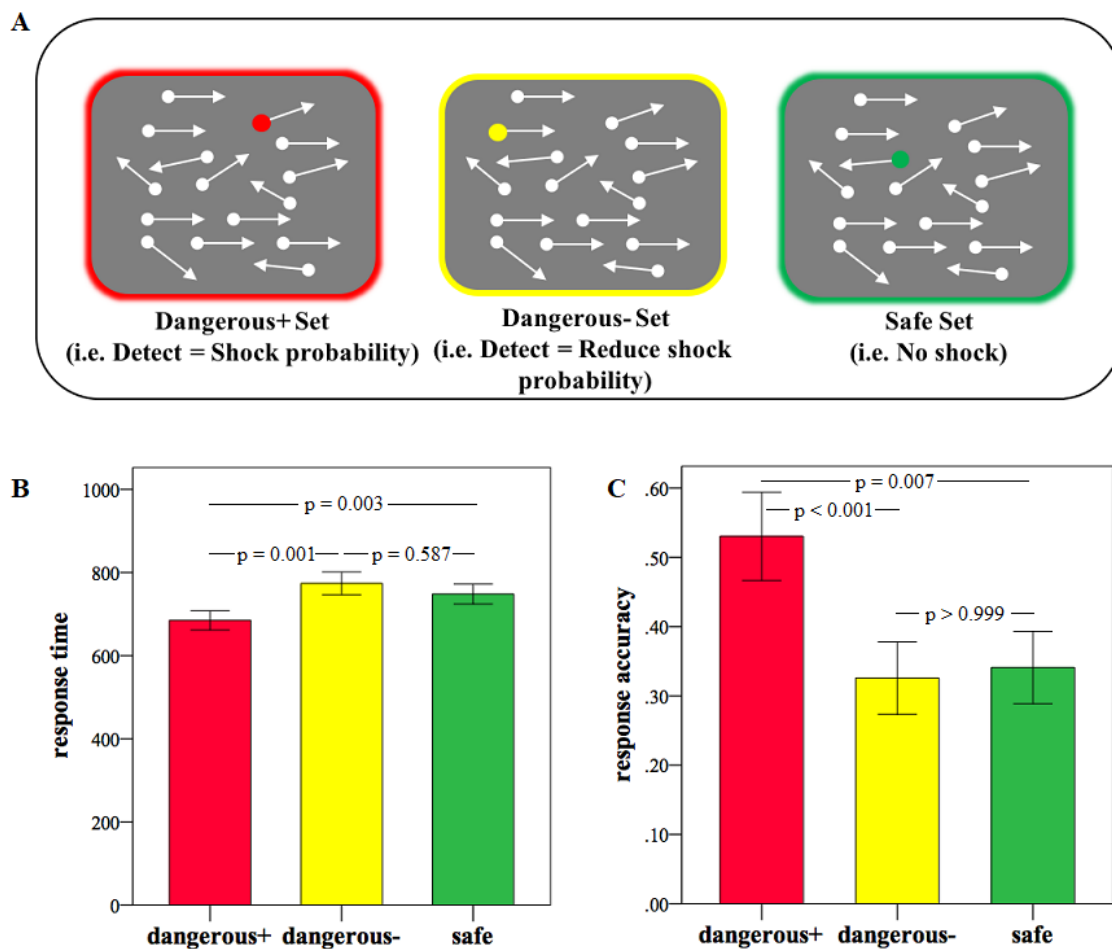

1

2 **Figure 2.** (A) Schematic examples of the cue detection task. Subjects were informed that the colored dot would appear at

3 any time point during the 2-s white dots screen and were instructed to respond as fast as possible before it disappeared.

4 Note that arrows indicate the moving direction of the dots rather than the stimuli *per se*. Mean response time (B) and

5 accuracy (C) to each cue condition in the cue detection task.

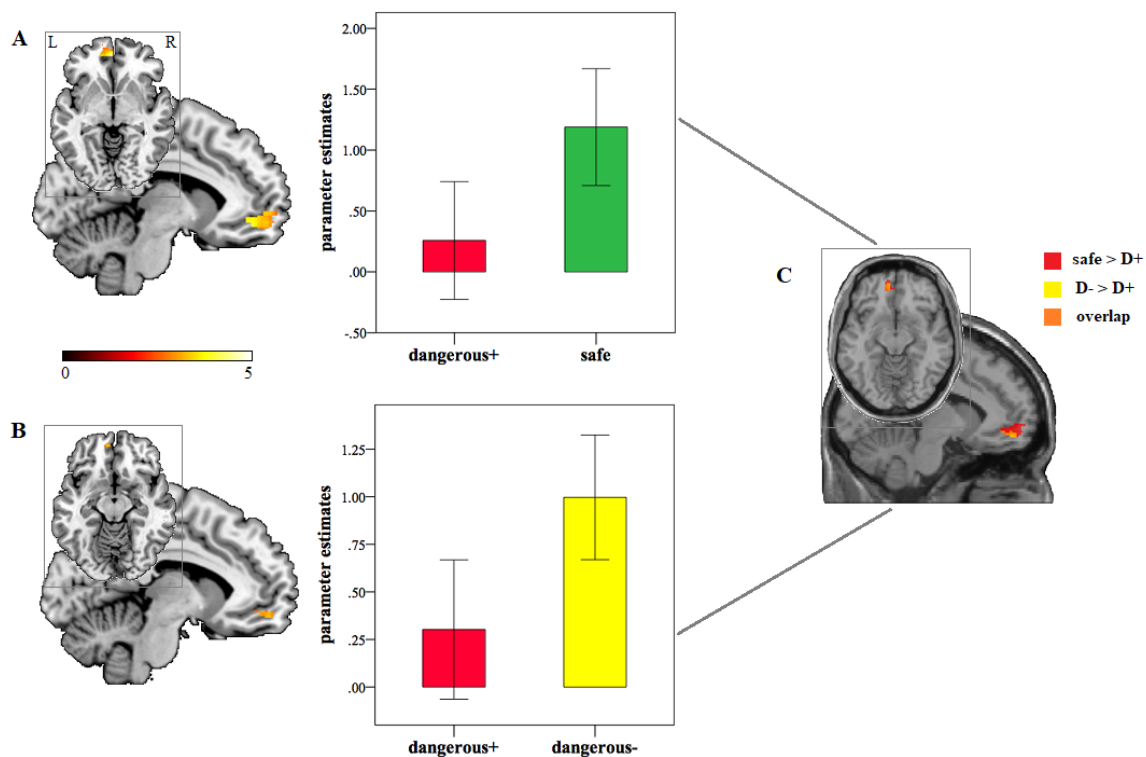

1

2 **Figure 3. Increased left vmPFC activity in the random dots motion (RDM) task in response to (A) the safe relative**

3 **to D+ threat conditions (safe > D+) and (B) to the D- relative to D+ threat conditions (D- > D+). (C) Overlap between**

4 **the 'safe > D+' and 'D- > D+' comparisons. Statistic maps were displayed with a  $P < 0.005$  uncorrected threshold. L: left.**

5 **R: right. D+: 'dangerous+'. D-: 'dangerous-'.**

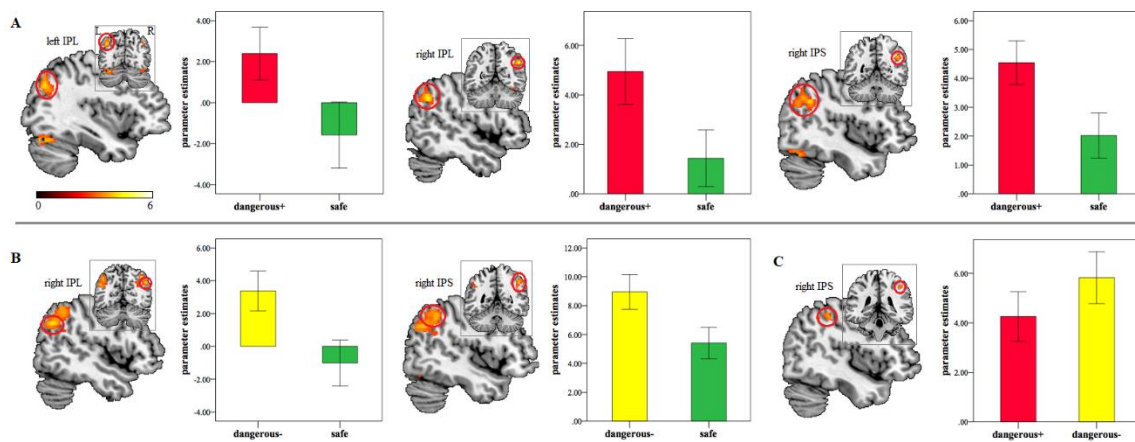

1

2 **Figure 4. Brain activation in the cues detection task in response to (A) the D+ relative to safe threat cues (D+ >**

3 **safe), (B) the D- relative to safe cues (D- > safe) and (C) the D- relative to D+ cues (D- > D+).** Statistic maps were

4 displayed with a  $P < 0.005$  uncorrected threshold. IPL: inferior parietal lobule. IPS: intraparietal sulcus. D+: 'dangerous+'.

5 D-: 'dangerous-'.

1 **Table 1. Brain regions activated in safe vs. 'danger+' conditions (safe > 'danger +').**

| Brain Regions                        | BA       | No. Voxels | Peak t-value | x   | y   | z   |
|--------------------------------------|----------|------------|--------------|-----|-----|-----|
| L. Rostral Anterior Cingulate Cortex | 10/32/24 | 1928       | 5.04         | -2  | 36  | -2  |
| Rostral Anterior Cingulate Cortex    |          |            | 4.98         | 0   | 38  | 6   |
| Dorsal Medial Prefrontal Cortex      |          |            | 4.66         | -10 | 62  | 6   |
| R. Middle Insula                     | 22/13    | 185        | 4.57         | 46  | 2   | -4  |
| Superior Temporal Gyrus              |          |            | 3.98         | 62  | -16 | 2   |
| Middle Temporal Gyrus                |          |            | 3.94         | 58  | -8  | -6  |
| L. Middle Insula                     | 13       | 37         | 4.40         | -36 | 2   | 20  |
| R. Ventral Medial Prefrontal Cortex  | 11       | 15         | 3.97         | 4   | 48  | -12 |
| L. Anterior Insula                   | 13       | 24         | 3.93         | -32 | 10  | -10 |
| R. Hippocampus                       |          | 14         | 3.69         | 34  | -24 | -10 |
| L. Dorsal Medial Prefrontal Cortex   |          | 11         | 3.47         | -8  | -20 | 52  |

2 All with a  $P_{FDR} < 0.05$  corrected threshold and cluster > 10 voxels. MNI coordinates were used. L indicates  
3 left; R indicates right.
